# Supplementary material
Source: PubMed Central journal article supplement (PMC4679666)
Supplement: NIHMS720207-supplement-1.pdf [file NIHMS720207-supplement-1.pdf]

Online Supplementary Materials for “A Common Spatial Factor  
Analysis Model for Measured Neighborhood-Level Characteristics:  
The Multi-Ethnic Study of Atherosclerosis”

Table 1: Deviance Information Criterion for Each Factor and Spatial Covariance Combination Model Fit.

| Covariance  | Factor  |         |         |
|-------------|---------|---------|---------|
|             | 1       | 2       | 3       |
| Exponential | -82.15  | 263.26  | 273.12  |
| Gaussian    | 714.49  | 647.01  | 701.88  |
| Non-Spatial | 1031.72 | 1023.48 | 1014.41 |

Table 2: Posterior Summaries for the Spatial Correlation Parameter  $\phi$  for Each Factor Fit Using the Exponential Covariance Structure.

| Factor | Mean | SD   | Quantile |      |       |
|--------|------|------|----------|------|-------|
|        |      |      | 0.025    | 0.50 | 0.975 |
| 1      | 0.28 | 0.08 | 0.14     | 0.29 | 0.44  |
| 2      | 0.35 | 0.09 | 0.20     | 0.35 | 0.53  |
| 3      | 0.34 | 0.08 | 0.18     | 0.33 | 0.51  |

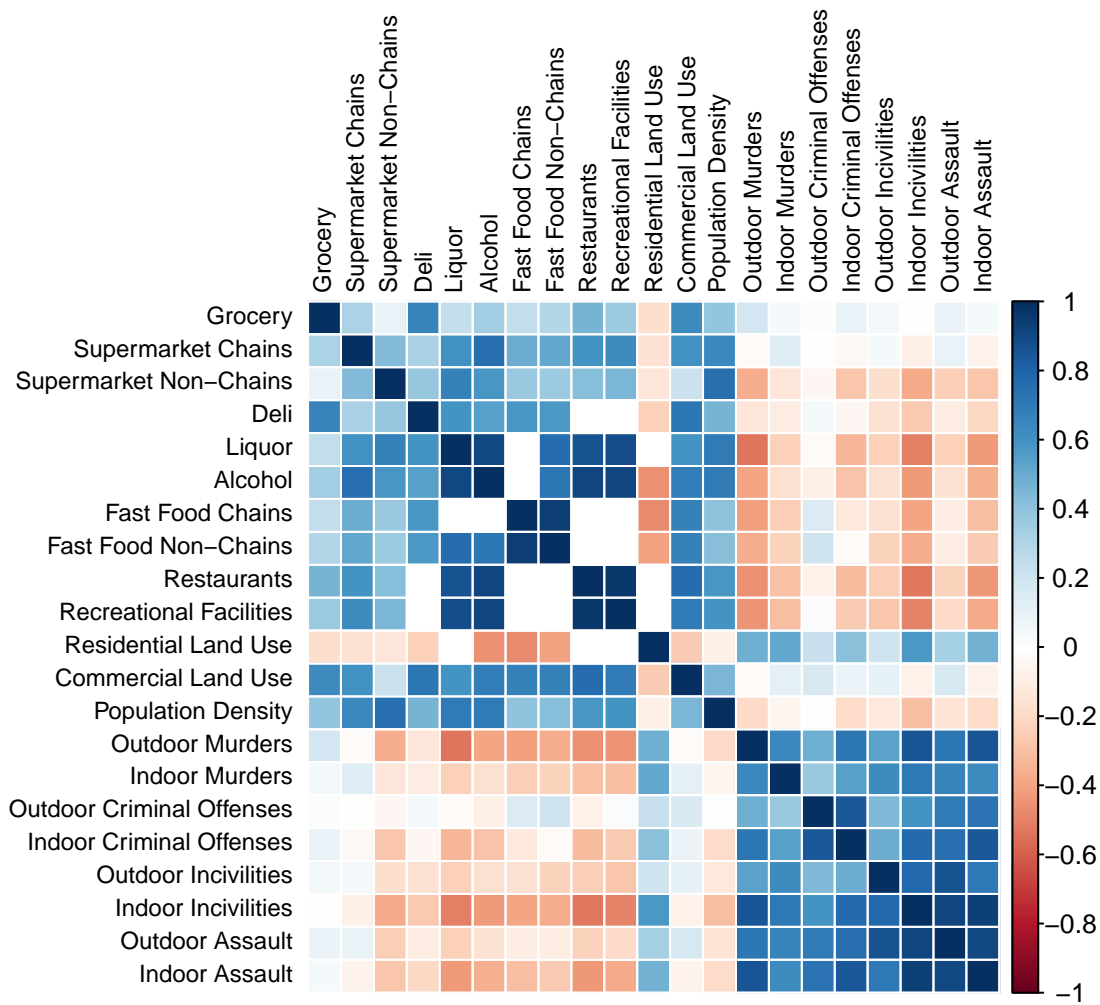

Figure 1: Correlation Heat Map for the 21 Mutually Exclusive Neighborhood-Level MESA Analysis Variables.

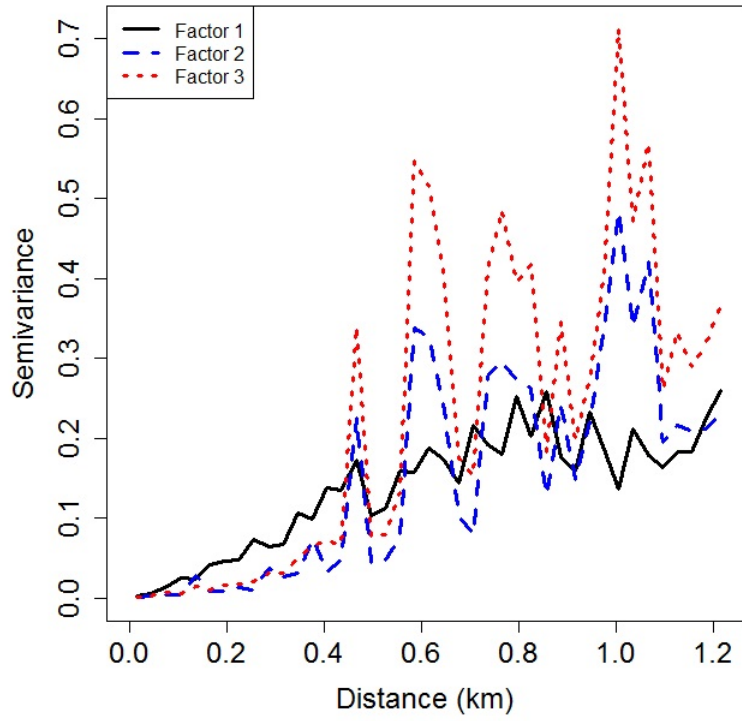

Figure 2: Empirical Semivariogram Plot for Each Factor Showing a Common Spatial Structure and Lack of Nugget Effect.
